# Supplementary material
Source: publisher figshare collection journal article supplement (https://tandf.figshare.com/ndownloader/files/14209334)
Supplement: Supplementary file 1 [file 14209334]

Supplementary Table S1

*Standardized regression weights for items in confirmatory factor analysis of two-factor model*

| Item | Standardized coefficient |
| --- | --- |
| Polyculturalism factor |  |
| Kelompok budaya yang berbeda-beda saling mempengaruhi satu sama lain, walaupun orang-orang yang ada di dalam kelompok budaya tersebut tidak betul-betul menyadari pengaruhnya.  [Different cultural groups impact one another, even if members of those groups are not completely aware of the impact.] | .82 |
| Meskipun masing-masing kelompok budaya tampak memiliki perbedaan yang cukup jelas, tetapi kelompok budaya yang satu berinteraksi dengan kelompok budaya yang lain sehingga saling mempengaruhi dalam proses yang mungkin tidak begitu jelas.  [Although cultural groups may seem to have some clear distinguishing qualities, cultural groups have interacted with one another and thus have influenced each other in ways that may not be readily apparent or discussed.] | .54 |
| Ada banyak jalinan relasi diantara budaya-budaya yang berbeda.  [There are many connections between different cultures.] | .19 |
| Kelompok budaya yang berbeda-beda saling mempengaruhi satu sama lain, walaupun orang-orang yang ada di dalam kelompok budaya tersebut tidak betul-betul menyadari pengaruhnya.  [Different cultures and racial groups probably share some traditions and perspectives because these groups have impacted each other to some extent over the years.] | .79 |
| Kelompok ras dan budaya yang berbeda saling mempengaruhi satu sama lain.  [Different racial and cultural groups influence each other.] | .45 |
| Multiculturalism factor |  |
| Semua budaya memiliki tradisi dan cara pandang sendiri-sendiri.  [All cultures have their own distinct traditions and perspectives.] | .57 |
| Terdapat suatu batas yang nyata namun tidak terlihat diantara kelompok-kelompok budaya yang berlainan karena adanya perbedaan di antara kelompok budaya tersebut.  [There are boundaries between different cultural groups because of the differences between cultures.] | .20 |
| Terdapat perbedaan pada kelompok ras dan budaya yang penting untuk dicermati.  [There are differences between racial and cultural groups which are important to recognize.] | .34 |
| Tiap kelompok budaya memiliki kelebihan dan potensi positifnya sendiri yang dapat diketahui/ diidentifikasi.  [Each cultural group has its own strengths that can be identified.] | .36 |
| Tiap kelompok ras dan budaya memiliki ciri-ciri penting yang membedakan kelompok satu dengan yang lain.  [Each racial and cultural group has important distinguishing characteristics.] | .57 |

Note: All standardized coefficients are significant at *p* < .05
